# Supplementary material
Source: PubMed Central journal article supplement (PMC4140533)
Supplement: es501811k_si_001.pdf [file es501811k_si_001.pdf]

Changes in serum concentrations of maternal poly- and perfluoroalkyl substances over the course of pregnancy and predictors of exposure in a multiethnic cohort of Cincinnati, Ohio pregnant women during 2003–2006

Kayoko Kato<sup>1)</sup>, Lee-Yang Wong<sup>1)</sup>, Aimin Chen<sup>2)</sup>, Carmen Dunbar<sup>1)</sup>, Glenys M. Webster<sup>3)</sup>, Bruce P. Lanphear<sup>3)</sup>, Antonia M. Calafat<sup>1)</sup>\*

SUPPORTING INFORMATION

Table S1. Median concentrations ( $\mu\text{g/L}$ ) of PFASs and frequency of detection for maternal sera (at each collection point) and cord sera.<sup>a</sup>

| Analyte       | Maternal, 16 weeks ( N=182)<br>[Frequency of detection, %] | Maternal, birth ( N=78)<br>[Frequency of detection, %] | Infant, cord (n=202)<br>[Frequency of detection, %] |
|---------------|------------------------------------------------------------|--------------------------------------------------------|-----------------------------------------------------|
| Et-PFOSA-ACOH | <LOD [27.5]                                                | <LOD [10.3]                                            | <LOD [21.3]                                         |
| Me-PFOSA-ACOH | 0.50 [99.5]                                                | 0.2 [89.7]                                             | 0.3 [92.1]                                          |
| PFOSA         | <LOD [1.0]                                                 | <LOD [0]                                               | <LOD [4.5]                                          |
| PFHxS         | 1.50 [99.5]                                                | 1.1 [93.6]                                             | 0.7 [99.0]                                          |
| PFOS          | 14.25 [100.0]                                              | 8.6 [100.0]                                            | 4.25 [99.5]                                         |
| PFOA          | 5.35 [100.0]                                               | 3.5 [100.0]                                            | 3.3 [100.0]                                         |
| PFNA          | 0.82 [100.0]                                               | 0.66 [100.0]                                           | 0.33 [99.5]                                         |
| PFDeA         | 0.20 [96.2]                                                | 0.20 [90.0]                                            | <LOD [13.4]                                         |

<sup>a</sup>The limits of detection (LODs) were 0.087  $\mu\text{g/L}$  (Me-PFOSA-AcOH), 0.082  $\mu\text{g/L}$  (PFNA), 0.1  $\mu\text{g/L}$  (PFHxS, PFOA, PFDeA, PFOSA, Et-PFOSA-AcOH), and 0.2  $\mu\text{g/L}$  (PFOS).

Table S2. Geometric mean serum concentrations (in µg/L) for select PFASs for 71 paired samples.<sup>a</sup>

|               |                    | <b>GM (95% Confidence interval )</b> |
|---------------|--------------------|--------------------------------------|
| Me-PFOSA-AcOH | Maternal, 16 weeks | 0.49 (0.42-0.58)                     |
|               | Maternal, delivery | 0.25 (0.21-0.29)                     |
|               | Infant, cord       | 0.27 (0.23-0.32)                     |
| PFHxS         | Maternal, 16 weeks | 1.33 (1.11-1.58)                     |
|               | Maternal, delivery | 1.15 (0.96-1.37)                     |
|               | Infant, cord       | 0.61 (0.51-0.73)                     |
| PFOS          | Maternal, 16 weeks | 11.57 (9.90-13.53)                   |
|               | Maternal, delivery | 8.20 (7.01-9.58)                     |
|               | Infant, cord       | 3.32 (2.84 -3.89)                    |
| PFOA          | Maternal, 16 weeks | 4.91 (4.32-5.59)                     |
|               | Maternal, delivery | 3.43 (3.01-3.90)                     |
|               | Infant, cord       | 2.85 (2.51-3.24)                     |
| PFNA          | Maternal, 16 weeks | 0.99 (0.90-1.1)                      |
|               | Maternal, delivery | 0.76 (0.69-0.85)                     |
|               | Infant, cord       | 0.49 (0.44-0.54)                     |

<sup>a</sup> Selected PFASs were those detected in >60% of samples at all time points.

Table S3. Geometric means of serum concentration ratios for select PFASs for 71 paired samples.<sup>a</sup>

| Geometric mean of concentration ratios ( 95 % Confidence interval) |                                           |                           |                           |
|--------------------------------------------------------------------|-------------------------------------------|---------------------------|---------------------------|
| Analyte                                                            | Maternal at 16 weeks/Maternal at delivery | Maternal at delivery/Cord | Maternal at 16 weeks/Cord |
| Me-PFOA-AcOH                                                       | 2.10 (1.92 ,2.30)                         | 0.90 (0.83 ,0.99)         | 1.90 (1.74 ,2.08)         |
| PFHxS                                                              | 1.26 (1.14 ,1.40)                         | 1.70 (1.54 ,1.89)         | 2.15 (1.94 ,2.38)         |
| PFOS                                                               | 1.41 (1.33 ,1.50)                         | 2.47 (2.32 ,2.63)         | 3.49 (3.28 ,3.71)         |
| PFOA                                                               | 1.43 (1.37 ,1.50)                         | 1.20 (1.15 ,1.26)         | 1.72 (1.65 ,1.80)         |
| PFNA                                                               | 1.30 (1.23 ,1.38)                         | 1.56 (1.47 ,1.65)         | 2.03 (1.92 ,2.15)         |

<sup>a</sup> Selected PFASs were those detected in >60% of samples at all time points.



Table S4. Percent change of geometric mean serum concentration for select PFASs for 71 paired samples.<sup>a</sup>

| Percent change of geometric mean concentrations ( 95% Confidence Interval) |                                |                              |                            |
|----------------------------------------------------------------------------|--------------------------------|------------------------------|----------------------------|
| Analyte                                                                    | Maternal at 16 wks vs delivery | Maternal at delivery vs cord | Maternal at 16 wks vs cord |
| MePFOSA-AcOH                                                               | -110.37 (-92.28,-130.15)       | 9.52 (17.3,1.01)             | -90.34 (-73.98,-108.24)    |
| PFHxS                                                                      | -26.11 (-13.97,-39.54)         | -70.41 (-54.01,-88.56)       | -114.91 (-94.23,-137.8)    |
| PFOS                                                                       | -41.21 (-32.89,-50.04)         | -147.04 (-132.49,-162.5)     | -248.83 (-228.28,-270.66)  |
| PFOA                                                                       | -43.31 (-36.89,-50.03)         | -20.26 (-14.87,-25.9)        | -72.34 (-64.62,-80.42)     |
| PFNA                                                                       | -30.23 (-23.01,-37.86)         | -55.83 (-47.2,-64.96)        | -102.93 (-91.69,-114.83)   |

<sup>a</sup> Selected PFASs were those detected in >60% of samples at all time points. Percent change between two concentrations =  $[1-(\text{geometric mean}_1/\text{geometric mean}_2)]*100$ . A negative change represents a decline

Table S5. Geometric mean concentrations of PFOS, PFOA, PFNA, PFHxS, and Me-PFOSA-AcOH in umbilical cord serum ( $\mu\text{g/L}$ ) according to demographic, perinatal and lifestyle factors. <sup>a</sup>

| Variables                                   | N (%)    | PFOS<br>GM<br>(95% CI) | GM ratio<br>(95% CI)             | PFOA<br>GM<br>(95% CI) | GM ratio<br>(95% CI)             | PFNA<br>GM<br>(95% CI) | GM ratio<br>(95% CI) | PFHxS<br>GM<br>(95% CI) | GM ratio<br>(95% CI)             | Me-PFOSA-AcOH<br>GM<br>(95% CI) | GM ratio<br>(95% CI) |
|---------------------------------------------|----------|------------------------|----------------------------------|------------------------|----------------------------------|------------------------|----------------------|-------------------------|----------------------------------|---------------------------------|----------------------|
| <b>Maternal Age (years)</b>                 |          |                        |                                  |                        |                                  |                        |                      |                         |                                  |                                 |                      |
| < 25                                        | 43 (21)  | 3.42<br>(2.83-4.14)    | 0.81<br>(0.65-1.01)              | 3.04<br>(2.57-3.6)     | 0.94<br>(0.78-1.15)              | 0.33<br>(0.29-0.38)    | 0.92<br>(0.79-1.08)  | 0.5<br>(0.41-0.62)      | 0.69<br>(0.54-0.88) <sup>b</sup> | 0.32<br>(0.25-0.4)              | 1.25<br>(0.96-1.64)  |
| > 35                                        | 31 (15)  | 5.18<br>(4.14-6.47)    | 1.23<br>(0.95-1.57)              | 4.32<br>(3.54-5.27)    | 1.34<br>(1.07-1.67) <sup>b</sup> | 0.43<br>(0.37-0.51)    | 1.21<br>(1.01-1.45)  | 0.84<br>(0.66-1.08)     | 1.16<br>(0.87-1.53)              | 0.29<br>(0.22-0.39)             | 1.17<br>(0.86-1.59)  |
| 25-34                                       | 128(64)  | 4.22<br>(3.78-4.72)    | Reference                        | 3.23<br>(2.92-3.56)    | Reference                        | 0.36<br>(0.33-0.39)    | Reference            | 0.73<br>(0.64-0.82)     | Reference                        | 0.25<br>(0.22-0.29)             | Reference            |
| <b>Race</b>                                 |          |                        |                                  |                        |                                  |                        |                      |                         |                                  |                                 |                      |
| Non-Hispanic black                          | 61(31.5) | 3.49<br>(2.97-4.1)     | 0.78<br>(0.65-0.95) <sup>b</sup> | 3.49<br>(2.97-4.1)     | 0.78<br>(0.65-0.95) <sup>b</sup> | 0.35<br>(0.31-0.39)    | 0.95<br>(0.83-1.09)  | 0.43<br>(0.36-0.5)      | 0.52<br>(0.43-0.64) <sup>b</sup> | 0.28<br>(0.23-0.34)             | 1.08<br>(0.85-1.37)  |
| Other                                       | 11(5.5)  | 5.31<br>(3.64-7.74)    | 1.19<br>(0.81-1.77)              | 5.31<br>(3.64-7.74)    | 1.19<br>(0.81-1.77)              | 0.44<br>(0.33-0.57)    | 1.2<br>(0.9-1.59)    | 1.12<br>(0.76-1.65)     | 1.36<br>(0.91-2.04)              | 0.34<br>(0.21-0.54)             | 1.31<br>(0.81-2.12)  |
| non-Hispanic white                          | 128 (64) | 4.45<br>(3.98-4.97)    | Reference                        | 4.45<br>(3.98-4.97)    | Reference                        | 0.37<br>(0.34-0.4)     | Reference            | 0.82<br>(0.73-0.92)     | Reference                        | 0.26<br>(0.23-0.3)              | Reference            |
| <b>Household income</b>                     |          |                        |                                  |                        |                                  |                        |                      |                         |                                  |                                 |                      |
| < \$20,000                                  | 34 (17)  | 3.17<br>(2.56-3.93)    | 0.69<br>(0.52-0.9) <sup>b</sup>  | 2.75<br>(2.27-3.33)    | 0.76<br>(0.59-0.96)              | 0.3<br>(0.26-0.35)     | 0.83<br>(0.69-1.01)  | 0.43<br>(0.34-0.55)     | 0.53<br>(0.4-0.71) <sup>b</sup>  | 0.31<br>(0.24-0.41)             | 1.1<br>(0.79-1.53)   |
| \$20,000-<br>\$40,000                       | 40 (20)  | 4.11<br>(3.38-5.01)    | 0.89<br>(0.69-1.15)              | 3.24<br>(2.71-3.87)    | 0.89<br>(0.71-1.12)              | 0.38<br>(0.33-0.44)    | 1.05<br>(0.88-1.26)  | 0.62<br>(0.5-0.77)      | 0.76<br>(0.58-1.01)              | 0.26<br>(0.2-0.33)              | 0.9<br>(0.66-1.23)   |
| \$40,000-<br>\$80,000                       | 68 (34)  | 4.41<br>(3.79-5.14)    | 0.95<br>(0.76-1.19)              | 3.47<br>(3.03-3.97)    | 0.95<br>(0.78-1.17)              | 0.39<br>(0.35-0.44)    | 1.09<br>(0.93-1.28)  | 0.79<br>(0.67-0.93)     | 0.96<br>(0.76-1.23)              | 0.25<br>(0.2-0.3)               | 0.86<br>(0.66-1.13)  |
| > \$80,000                                  | 58 (29)  | 4.62<br>(3.92-5.45)    | Reference                        | 3.64<br>(3.14-4.21)    | Reference                        | 0.36<br>(0.32-0.41)    | Reference            | 0.82<br>(0.68-0.98)     | Reference                        | 0.28<br>(0.23-0.35)             | Reference            |
| <b>BMI<sup>c</sup></b>                      |          |                        |                                  |                        |                                  |                        |                      |                         |                                  |                                 |                      |
| Obese<br>( $\geq 30 \text{ Kg/m}^2$ )       | 51 (25)  | 3.82<br>(3.19-4.56)    | 0.88<br>(0.7-1.11)               | 3.26<br>(2.78-3.82)    | 0.94<br>(0.76-1.15)              | 0.34<br>(0.3-0.39)     | 0.94<br>(0.8-1.1)    | 0.62<br>(0.51-0.75)     | 0.93<br>(0.72-1.19)              | 0.29<br>(0.23-0.36)             | 1.06<br>(0.8-1.39)   |
| Overweight<br>( $25- 29.9 \text{ Kg/m}^2$ ) | 70 (35)  | 4.27<br>(3.67-4.97)    | 0.99<br>(0.8-1.21)               | 3.26<br>(2.85-3.73)    | 0.94<br>(0.78-1.13)              | 0.38<br>(0.34-0.42)    | 1.03<br>(0.89-1.19)  | 0.79<br>(0.67-0.94)     | 1.19<br>(0.95-1.5)               | 0.26<br>(0.21-0.31)             | 0.94<br>(0.73-1.21)  |
| Normal<br>( $< 24.9 \text{ Kg/m}^2$ )       | 79 (39)  | 4.33<br>(3.75-4.99)    | Reference                        | 3.48<br>(3.07-3.96)    | Reference                        | 0.37<br>(0.33-0.41)    | Reference            | 0.67<br>(0.57-0.78)     | Reference                        | 0.27<br>(0.23-0.32)             | Reference            |
| <b>Breast feeding history</b>               |          |                        |                                  |                        |                                  |                        |                      |                         |                                  |                                 |                      |
| Yes                                         | 82 (40)  | 3.58<br>(3.12-4.1)     | 0.77<br>(0.65-0.92) <sup>b</sup> | 2.74<br>(2.43-3.09)    | 0.72<br>(0.62-0.84) <sup>b</sup> | 0.35<br>(0.32-0.39)    | 0.94<br>(0.83-1.07)  | 0.6<br>(0.52-0.7)       | 0.8<br>(0.65-0.98) <sup>b</sup>  | 0.27<br>(0.23-0.32)             | 1<br>(0.81-1.25)     |
| No                                          | 120 (60) | 4.62<br>(4.13-5.18)    | Reference                        | 3.81<br>(3.45-4.21)    | Reference                        | 0.37<br>(0.34-0.4)     | Reference            | 0.75<br>(0.66-0.86)     | Reference                        | 0.27<br>(0.23-0.31)             | Reference            |
| <b>Education</b>                            |          |                        |                                  |                        |                                  |                        |                      |                         |                                  |                                 |                      |
| < 12 years                                  | 15 (7.5) | 3.81<br>(2.75-5.29)    | 0.89<br>(0.63-1.26)              | 3.19<br>(2.38-4.28)    | 0.95<br>(0.7-1.29)               | 0.35<br>(0.28-0.45)    | 0.96<br>(0.75-1.22)  | 0.47<br>(0.33-0.68)     | 0.64<br>(0.44-0.94) <sup>b</sup> | 0.3<br>(0.2-0.45)               | 1.18<br>(0.78-1.79)  |
| 12 years                                    | 27(13.5) | 3.84<br>(3.01-4.9)     | 0.9<br>(0.69-1.17)               | 3.21<br>(2.58-3.99)    | 0.95<br>(0.75-1.21)              | 0.34<br>(0.29-0.41)    | 0.93<br>(0.77-1.12)  | 0.55<br>(0.42-0.72)     | 0.74<br>(0.55-1)                 | 0.33<br>(0.25-0.45)             | 1.29<br>(0.94-1.78)  |
| > 12 years                                  | 158 (79) | 4.27<br>(3.86-4.72)    | Reference                        | 3.37<br>(3.08-3.69)    | Reference                        | 0.37<br>(0.34-0.4)     | Reference            | 0.74<br>(0.66-0.83)     | Reference                        | 0.26<br>(0.23-0.29)             | Reference            |

| <b>Gestational age</b>       |           |                     |                                  |                     |                                 |                     |                     |                     |                                  |                     |                    |
|------------------------------|-----------|---------------------|----------------------------------|---------------------|---------------------------------|---------------------|---------------------|---------------------|----------------------------------|---------------------|--------------------|
| preterm (< 37 weeks)         | 16 (8)    | 3.06<br>(2.24-4.19) | 0.72<br>(0.52-0.99) <sup>b</sup> | 2.72<br>(2.05-3.59) | 0.8<br>(0.6-1.07)               | 0.3<br>(0.24-0.38)  | 0.81<br>(0.64-1.03) | 0.55<br>(0.39-0.79) | 0.79<br>(0.55-1.14)              | 0.34<br>(0.23-0.5)  | 1.3<br>(0.87-1.93) |
| Term (≥ 37 weeks)            | 186 (92)  | 4.28<br>(3.9-4.69)  | Reference                        | 3.39<br>(3.12-3.68) | Reference                       | 0.37<br>(0.34-0.39) | Reference           | 0.7<br>(0.63-0.78)  | Reference                        | 0.26<br>(0.24-0.3)  | Reference          |
| <b>Serum cotinine (µg/L)</b> |           |                     |                                  |                     |                                 |                     |                     |                     |                                  |                     |                    |
| active smoker (≥3)           | 90 (44.5) | 3.89<br>(2.89-5.23) | 0.85<br>(0.61-1.17)              | 3.18<br>(2.44-4.15) | 0.93<br>(0.69-1.24)             | 0.36<br>(0.29-0.44) | 0.95<br>(0.75-1.19) | 0.62<br>(0.45-0.87) | 0.79<br>(0.55-1.14)              | 0.3<br>(0.21-0.43)  | 1.1<br>(0.74-1.64) |
| secondhand smoker (0.015-3)  | 94 (46.5) | 3.85<br>(3.38-4.38) | 0.84<br>(0.7-1.01)               | 3.27<br>(2.91-3.68) | 0.95<br>(0.81-1.13)             | 0.35<br>(0.32-0.38) | 0.93<br>(0.81-1.06) | 0.62<br>(0.53-0.71) | 0.79<br>(0.64-0.97) <sup>b</sup> | 0.27<br>(0.23-0.31) | 1<br>(0.79-1.25)   |
| non smoker (<0.015)          | 18 (9)    | 4.59<br>(4.02-5.24) | Reference                        | 3.43<br>(3.04-3.86) | Reference                       | 0.38<br>(0.34-0.41) | Reference           | 0.78<br>(0.68-0.91) | Reference                        | 0.27<br>(0.23-0.32) | Reference          |
| <b>Parity</b>                |           |                     |                                  |                     |                                 |                     |                     |                     |                                  |                     |                    |
| >1                           | 52 (26)   | 4.01<br>(3.43-4.7)  | 0.75<br>(0.6-0.94) <sup>b</sup>  | 2.99<br>(2.58-3.48) | 0.75<br>(0.62-0.9) <sup>b</sup> | 0.35<br>(0.31-0.4)  | 0.92<br>(0.79-1.08) | 0.61<br>(0.5-0.74)  | 0.77<br>(0.6-0.99) <sup>a</sup>  | 0.35<br>(0.28-0.44) | 1.18<br>(0.9-1.55) |
| 1                            | 63 (31)   | 4.72<br>(4.13-5.39) | 0.85<br>(0.69-1.05)              | 2.81<br>(2.45-3.22) | 0.7<br>(0.58-0.84) <sup>b</sup> | 0.35<br>(0.31-0.39) | 0.92<br>(0.79-1.07) | 0.62<br>(0.52-0.75) | 0.79<br>(0.62-1) <sup>b</sup>    | 0.3<br>(0.25-0.36)  | 1<br>(0.78-1.29)   |
| 0                            | 87 (43)   | 3.55<br>(2.98-4.22) | Reference                        | 4.02<br>(3.58-4.51) | Reference                       | 0.38<br>(0.34-0.42) | Reference           | 0.79<br>(0.68-0.92) | Reference                        | 0.3<br>(0.25-0.35)  | Reference          |

<sup>a</sup> Ratios are the exponentiated beta coefficients from a linear regression model with the PFAS concentrations in cord serum as the outcome. Ratios represent the multiplicative difference in PFAS concentrations from the reference category. Thus, numeric estimates indicate that GM concentrations were higher (>1) or lower (<1) for the predictor (variable) in that category compared with the reference category. Each predictor was run in a separate model. <sup>b</sup>P <0.05. <sup>c</sup>We excluded two underweight participants with BMI <18 Kg/m<sup>2</sup>.
